# Supplementary material
Source: PubMed Central journal article supplement (PMC3561765)
Supplement: NIHMS429184-supplement-Supplementary_Figure_1.pdf [file NIHMS429184-supplement-Supplementary_Figure_1.pdf]

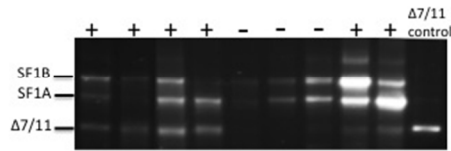

Supplementary Figure 1. Expression in breast Tumor Biopsies. Total RNA was extracted from breast tumor samples and analyzed via PCR for expression of  $\Delta 7/11$ . the PCR products from the six positive and three representative negative are shown. A total of 62 samples were analyzed. Plasmid DNA was used as a positive control for  $\Delta 7/11$  expression (lane 10).

254x190mm (72 x 72 DPI)
