# Supplementary material
Source: PubMed Central journal article supplement (PMC3561765)
Supplement: NIHMS429184-supplement-Supplementary_Figure_2.pdf [file NIHMS429184-supplement-Supplementary_Figure_2.pdf]

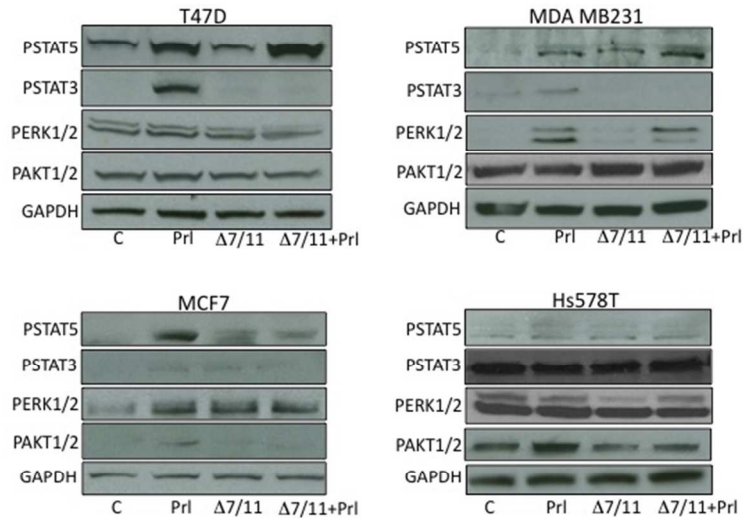

Supplementary Figure 2. Signaling pathways evaluated when breast epithelial cells were stimulated with prolactin, D7/11, or the combination. Cells were plated at  $2 \times 10^4$  cells/cm<sup>2</sup> in growth media. Twenty four h post-plating cells were washed, incubated overnight in 0.01% charcoal stripped serum, and then treated with serum free media (C), serum-free media + 100 ng/ml prolactin (Prl), serum-free media + 250 ng/ml recombinant D7/11, or the combination of Prl and D7/11 for 5 min. A. Cell lysates (50  $\mu$ g) were resolved by SDS-PAGE and immunoblotted with antibodies specific for phosphorylated (P) STAT5, AKT1/2 or ERK1/2. GAPDH was used as a loading control to show equal protein loading. Figure shows representative immunoblots of at least two separate experiments.
